# Supplementary material for: Augmentation of CD47/SIRPα signaling protects cones in genetic models of retinal degeneration
Source: JCI journal article supplement (doi:10.1172/jci.insight.150796), 2021-07-01
Supplement: sd1 [file 1]

## SUPPLEMENTAL METHODS

*Retinal pigment epithelium (RPE) immunostaining.* To assess the morphology of the RPE, enucleated eyes were dissected to remove the cornea, iris, lens, ciliary body, retina, and connective tissue. The remaining RPE-choroid-sclera complex was fixed in 4% paraformaldehyde for one hour at room temperature, blocked in PBS containing 5% donkey serum and 0.3% Triton X-100 for one hour, and stained with 1:100 of anti-ZO-1 (ThermoFisher Scientific, 61-7300) for two nights at 4°C. Samples were subsequently incubated with 1:1000 of donkey anti-rabbit secondary antibody (Jackson ImmunoResearch, 711-585-152) in PBS for two hours at room temperature, relaxed with four radial incisions, and flat-mounted onto microscope slides. Images of ZO-1 immunostaining in flat-mounted RPE preparations were acquired in the mid-periphery using a Zeiss LSM710 scanning confocal microscope (20x air objective) and displayed as maximum intensity projections.

*Quantitative polymerase chain reaction (qPCR).* RNA was isolated from *rd1* (FVB) and wild-type (sighted FVB) retinas using an RNeasy Micro Kit (Qiagen) with one whole retina collected per sample. cDNA was then synthesized using the SuperScript III First-Strand Synthesis System (Invitrogen) with oligo(dT) primers, and qPCR was performed using the Power SYBR Green PCR Master Mix (Applied Biosystems) on a CFX96 real-time PCR detection system (Bio-Rad). Reactions were conducted in triplicate with expression normalized to either *Gapdh*, a housekeeping gene, or *Thy1*, a marker for retinal ganglion cells. qPCR primer sequences are listed in Supplemental Table 2.

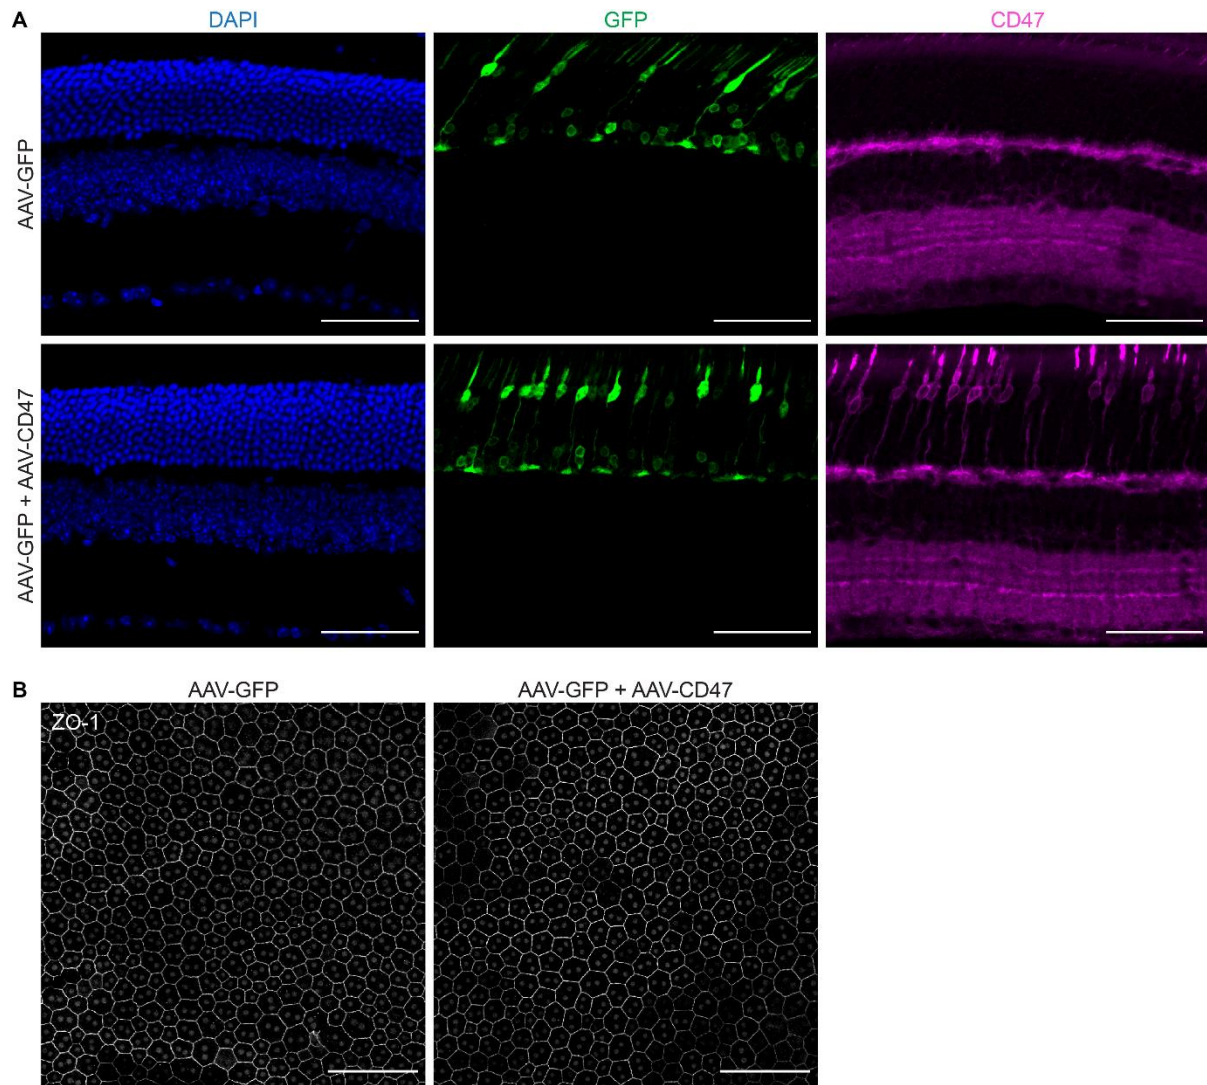

**Supplemental Figure 1. Long-term expression of CD47 in wild-type retinas.**

(A) Immunostaining for CD47 in P100 wild-type (CD-1) retinas following infection with AAV8-RedO-GFP or AAV8-RedO-GFP plus AAV8-RedO-CD47. Nuclei were labeled with 4',6-diamidino-2-phenylindole (DAPI). Scale bars, 50  $\mu$ m. (B) Immunostaining for ZO-1, a marker of epithelial tight junctions, in flat-mounted RPE preparations from P100 wild-type eyes following infection with AAV8-RedO-GFP or AAV8-RedO-GFP plus AAV8-RedO-CD47. Scale bars, 100  $\mu$ m.

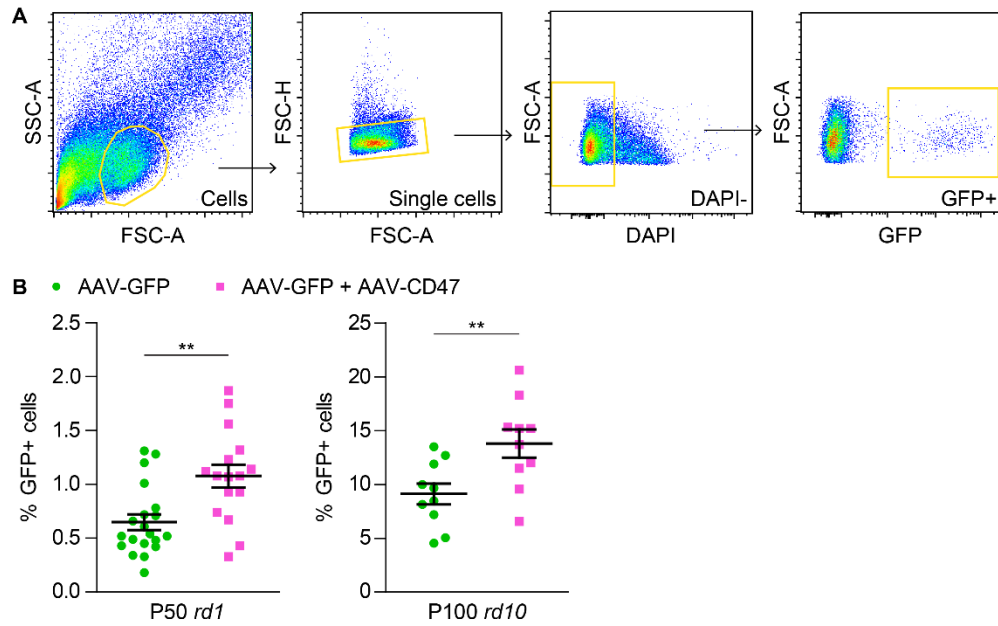

**Supplemental Figure 2. Quantification of cone survival by flow cytometry.**

(A) Flow cytometry gating for GFP-positive cones in *rd1* and *rd10* retinas following infection with AAV8-RedO-GFP or AAV8-RedO-GFP plus AAV8-RedO-CD47. (B) Quantification by flow cytometry of GFP-positive cones in P50 *rd1* ( $n = 16-20$ ) and P100 *rd10* ( $n = 10$ ) retinas following infection with AAV8-RedO-GFP or AAV8-RedO-GFP plus AAV8-RedO-CD47. Data are shown as mean  $\pm$  SEM. \*\*  $P < 0.01$  by two-tailed Student's t-test.

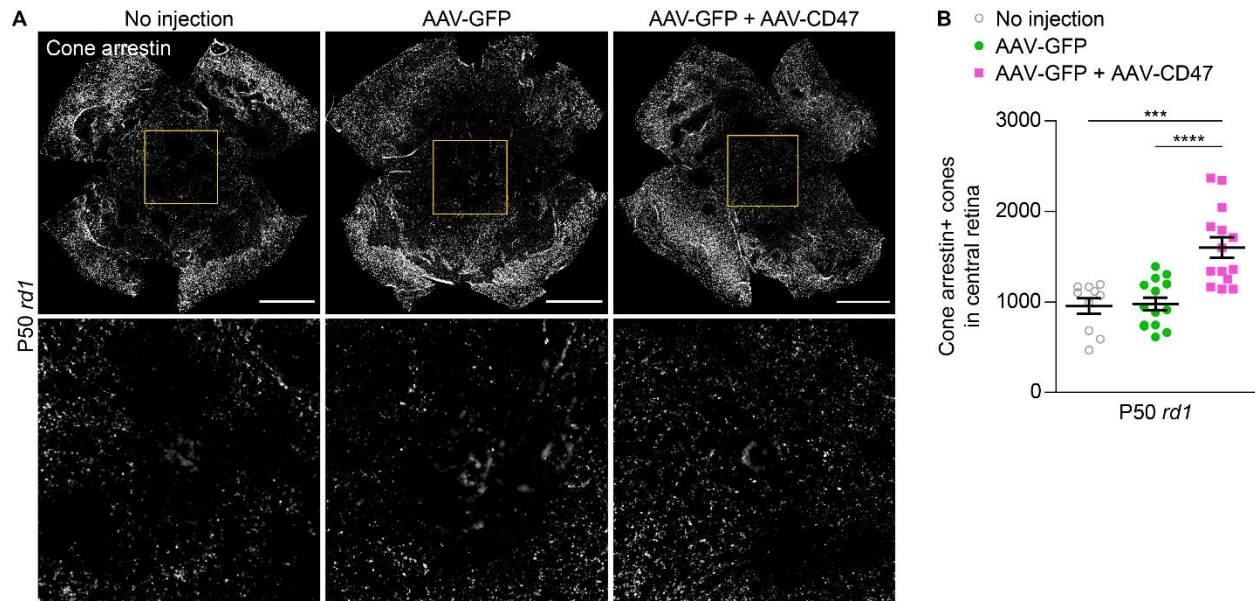

**Supplemental Figure 3. Quantification of cone survival by immunostaining.**

(A) Representative flat-mounts of P50 *rd1* retinas without treatment or following infection with AAV8-RedO-GFP or AAV8-RedO-GFP plus AAV8-RedO-CD47 after cone arrestin immunostaining. Paired images depict low and high magnifications. Scale bars, 1 mm. (B) Quantification of cone arrestin immunostaining in central retinas of *rd1* mice ( $n = 10-14$ ) without treatment or following infection with AAV8-RedO-GFP or AAV8-RedO-GFP plus AAV8-RedO-CD47. Data are shown as mean  $\pm$  SEM. \*\*\*  $P < 0.001$ , \*\*\*\*  $P < 0.0001$  by two-tailed Student's t-test.

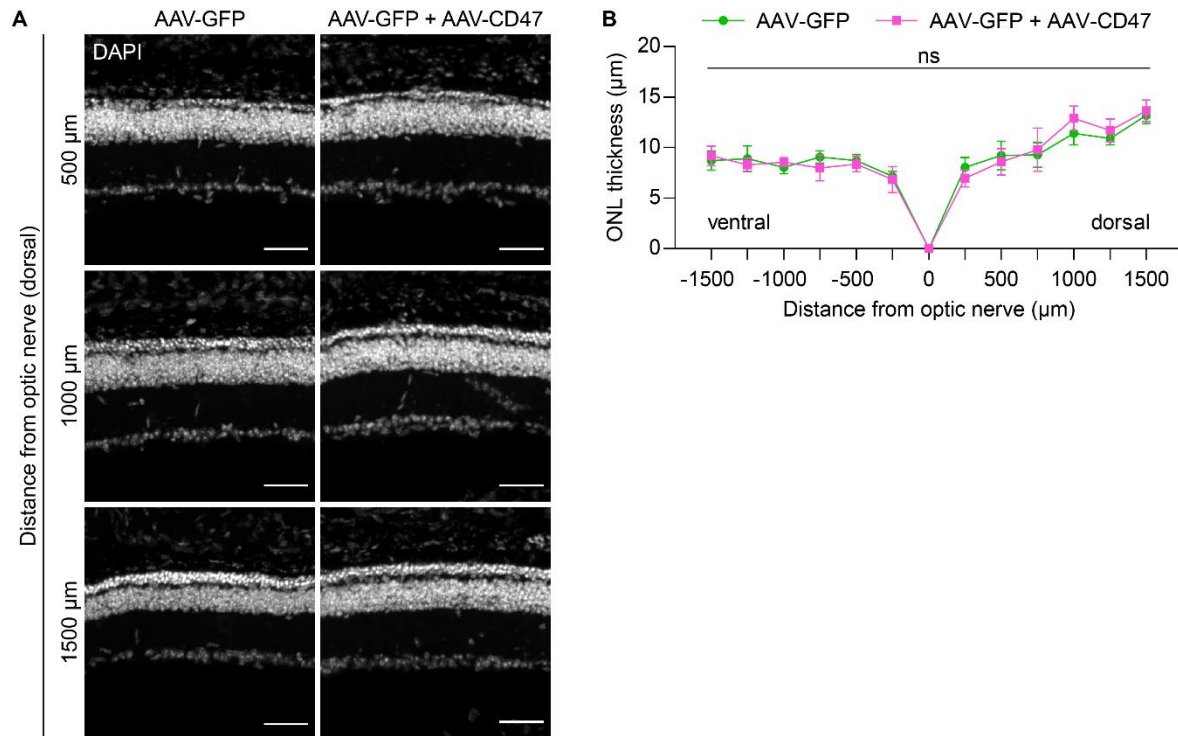

**Supplemental Figure 4. Effect of CD47 expression on rod survival.**

(A, B) Representative cross-sections (A) and measurements of outer nuclear layer (ONL) thickness (B) at indicated distances from the optic nerve in P40 *rd10* retinas ( $n = 5$ ) following infection with AAV8-RedO-GFP or AAV8-RedO-GFP plus AAV8-RedO-CD47. Nuclei were labeled with DAPI. Scale bars, 50  $\mu\text{m}$ . Data are shown as mean  $\pm$  SEM. ns, not significant.

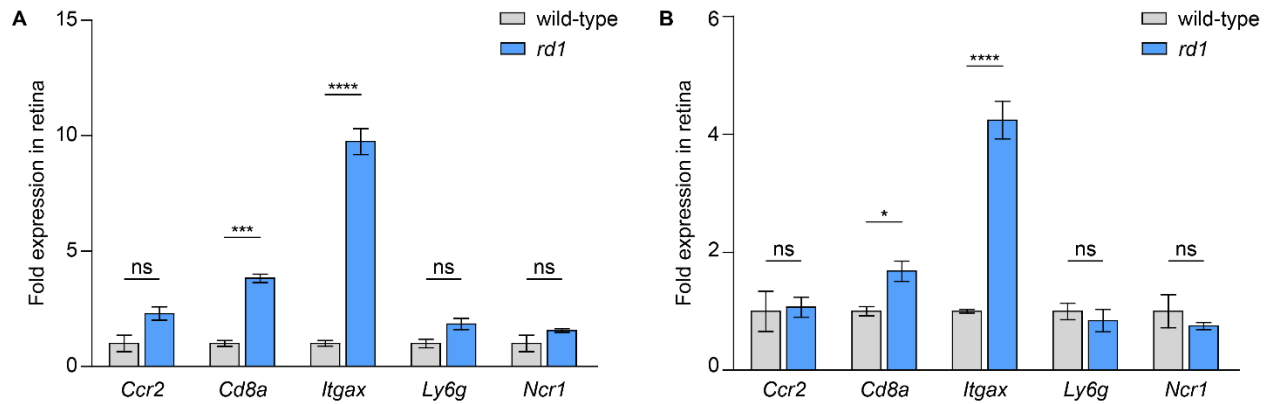

**Supplemental Figure 5. Retinal expression of SIRP $\alpha$ -positive immune cell types.**

(**A**, **B**) RNA expression of marker genes for monocytes (*Ccr2*), cytotoxic T cells (*Cd8a*), dendritic cells (*Itgax*), neutrophils (*Ly6g*), and natural killer cells (*Ncr1*) in retinas (n = 4–5) from 6- to 8-week-old wild-type (sighted FVB) or P40 *rd1* mice after normalization to either the housekeeping gene *Gapdh* (A) or the retinal ganglion cell marker *Thy1* (B). Data are shown as mean  $\pm$  SEM. \*  $P < 0.05$ , \*\*\*  $P < 0.001$ , \*\*\*\*  $P < 0.0001$  by two-tailed Student's t-test with Bonferroni correction. ns, not significant.

**Supplemental Table 1. Summary of mouse experiments.**

| <b>Mutation</b>           | <b>Strain(s)</b>                                                                                                                        | <b>Assay or intervention</b>   | <b>Age(s)</b> |
|---------------------------|-----------------------------------------------------------------------------------------------------------------------------------------|--------------------------------|---------------|
| wild-type                 | Sighted CX3CR1 <sup>GFP/+</sup>                                                                                                         | Ex vivo phagocytosis           | P20, P50      |
|                           | CD-1                                                                                                                                    | Retinal histology              | P40, P100     |
|                           | CD-1                                                                                                                                    | RPE histology                  | P100          |
|                           | Sighted C3H                                                                                                                             | Light-dark discrimination      | P30           |
|                           | Sighted FVB                                                                                                                             | qPCR                           | 6-8 weeks     |
| <i>rd1</i>                | <i>rd1</i> ;CX3CR1 <sup>GFP/+</sup>                                                                                                     | Ex vivo phagocytosis           | P20, P50      |
|                           | FVB, <i>rd1</i> ;CreERT2/+, <i>rd1</i> ;TSP1 <sup>-/-</sup> , <i>rd1</i> ;SIRPα <sup>-/-</sup>                                          | Cone survival (histology)      | P50           |
|                           | FVB                                                                                                                                     | Cone survival (flow cytometry) | P50           |
|                           | C3H                                                                                                                                     | Light-dark discrimination      | P30           |
|                           | <i>rd1</i> ;CreERT2/+                                                                                                                   | Tamoxifen                      | P19-21        |
|                           | FVB                                                                                                                                     | Microglia depletion            | P20-49        |
|                           | <i>rd1</i> ;TSP1 <sup>+/-</sup> , <i>rd1</i> ;TSP1 <sup>-/-</sup> , <i>rd1</i> ;SIRPα <sup>+/-</sup> , <i>rd1</i> ;SIRPα <sup>-/-</sup> | Retinal histology              | P30           |
|                           | FVB                                                                                                                                     | qPCR                           | P40           |
| <i>rd10</i>               | <i>rd10</i>                                                                                                                             | Cone survival (histology)      | P130          |
|                           | <i>rd10</i>                                                                                                                             | Cone survival (flow cytometry) | P100          |
|                           | <i>rd10</i>                                                                                                                             | Rod survival                   | P40           |
|                           | <i>rd10</i>                                                                                                                             | Optomotor                      | P60           |
| <i>Rho</i> <sup>-/-</sup> | <i>Rho</i> <sup>-/-</sup>                                                                                                               | Cone survival (histology)      | P150          |

**Supplemental Table 2. qPCR primer sequences.**

| <b>Gene</b>  | <b>5'</b>                | <b>3'</b>                |
|--------------|--------------------------|--------------------------|
| <i>Ccr2</i>  | ATCCACGGCATACTATCAACATC  | CAAGGCTCACCATCATCGTAG    |
| <i>Cd8a</i>  | CCGTTGACCCGCTTTCTGT      | CGGCGTCCATTTTCTTTGGAA    |
| <i>Gapdh</i> | AGGTCGGTGTGAACGGATTTG    | TGTAGACCATGTAGTTGAGGTCA  |
| <i>Itgax</i> | CTGGATAGCCTTTCTTCTGCTG   | GCACACTGTGTCCGAACTCA     |
| <i>Ly6g</i>  | GACTTCCTGCAACACAACACTACC | ACAGCATTACCAGTGATCTCAGT  |
| <i>Ncr1</i>  | ATGCTGCCAACACTCACTG      | GATG TTCACCGAGTTTCCATTTG |
| <i>Thy1</i>  | TGCTCTCAGTCTTGCAGGTG     | TGGATGGAGTTATCCTTGGTGTT  |
